# Supplementary material
Source: PubMed Central journal article supplement (PMC7403657)
Supplement: EMBR-21-e49823-s001.pdf [file EMBR-21-e49823-s001.pdf]

## Appendix Figures

**(Page 2) Appendix Figure S1. Genotypes of novel mutant CH12 cells generated for this study.**

WT CH12 cells were used to knockout the indicated genes through CRISPR/Cas9 using the gRNAs listed in Table EV2. Sequencing results for each of these mutants are shown.

**(Page 3) Appendix Figure S2. Flow Cytometry analysis of Iglo WT, 53bp1<sup>-/-</sup> and Shld2<sup>-/-</sup> CH12**

**subclones.** Ig-lo cells from WT, 53bp1<sup>-/-</sup> and Shld2<sup>-/-</sup> CH12 cells were sorted and subcloned and reanalyzed for expression of IgM and IgA by flow cytometry. As positive controls, expression of IgA and IgM are shown for two specific subclones that are IgA or IgM positive.

**Xlf #1 (586/A05)**

1  
WT V S Q H L I H P L M G V S L A L Q S H V R E L A A L L R M K D L E I Q A Y Q E S G A  
GTCTCTCAGCATTGATTCACTCTCTGATGGGCTGTAGCCCTGGCACTGCAGAGTCATGTGAGGGAGCTAGCAGCATTGCTTCGGATGAAGGACCTTGAGATCCAGGCCCTACCAGGAGAGTGGGGCT  
Allele 1 GTCTCTCAGCATTGATTCACTCTCTGATGGGCTGTAGCCCTGGCACTGCAGAGTCATGTGAGGGAGCTAGCAGCATTGCTTCGGATGAAGGACCTTGAGATCCAGGCCCTACCAGGAGAGTGGGGCT

V S Q H L I H P L M G V S L A L Q S H V R E L A A L L R M K D L E I Q A Y Q E S G A  
WT GTCTCTCAGCATTGATTCACTCTCTGATGGGCTGTAGCCCTGGCACTGCAGAGTCATGTGAGGGAGCTAGCAGCATTGCTTCGGATGAAGGACCTTGAGATCCAGGCCCTACCAGGAGAGTGGGGCT  
Allele 2 GTCTCTCAGCATTGATTCACTCTCTGATGGGCTGTAGCCCTGGCACTGCAGAGTCATGTGAGGGAGCTAGCAGCATTGCTTCGGATGAAGGACCTTGAGATCCAGGCCCTACCAGGAGAGTGGGGCT

**Xlf #2 (586/B10)**

1  
WT V S Q H L I H P L M G V S L A L Q S H V R E L A A L L R M K D L E I Q A Y Q E S G A  
GTCTCTCAGCATTGATTCACTCTCTGATGGGCTGTAGCCCTGGCACTGCAGAGTCATGTGAGGGAGCTAGCAGCATTGCTTCGGATGAAGGACCTTGAGATCCAGGCCCTACCAGGAGAGTGGGGCT  
Allele 1 GTCTCTCAGCATTGATTCACTCTCTGATGGGCTGTAGCCCTGGCACTGCAGAGTCATGTGAGGGAGCTAGCAGCATTGCTTCGGATGAAGGACCTTGAGATCCAGGCCCTACCAGGAGAGTGGGGCT

V S Q H L I H P L M G V S L A L Q S H V R E L A A L L R M K D L E I Q A Y Q E S G A  
WT GTCTCTCAGCATTGATTCACTCTCTGATGGGCTGTAGCCCTGGCACTGCAGAGTCATGTGAGGGAGCTAGCAGCATTGCTTCGGATGAAGGACCTTGAGATCCAGGCCCTACCAGGAGAGTGGGGCT  
Allele 2 GTCTCTCAGCATTGATTCACTCTCTGATGGGCTGTAGCCCTGGCACTGCAGAGTCATGTGAGGGAGCTAGCAGCATTGCTTCGGATGAAGGACCTTGAGATCCAGGCCCTACCAGGAGAGTGGGGCT

**Xrcc4 #1 (999/15)**

1  
WT M E R K V S R I Y L A S E P N V P Y F L Q V S W E R T I G S G F V I T L T D G H S A W  
ATGGAAGGAAAGTAAGCAGAAATCTATCTTGCTCTGAACCCCAACGTACCTTATTTCTGCAAGTGTCTTGGGAGAGAACAAATAGGATCCGGCTTTGTTATTACACTTACTGACGGCCATTACAGCCTGG  
Allele 1 ATGGAAGGAAAGTAAGCAGAAATCTATCTTGCTCTGAACCCCAACGTACCTTATTTCTGCAAGTGTCTTGGGAGAGAACAAATAG-ATCCGGCTTTGTTATTACACTTACTGACGGCCATTACAGCCTGG

M E R K V S R I Y L A S E P N V P Y F L Q V S W E R T I G S G F V I T L T D G H S A W  
WT ATGGAAGGAAAGTAAGCAGAAATCTATCTTGCTCTGAACCCCAACGTACCTTATTTCTGCAAGTGTCTTGGGAGAGAACAAATAGGATCCGGCTTTGTTATTACACTTACTGACGGCCATTACAGCCTGG  
Allele 2 ATGGAAGGAAAGTAAGCAGAAATCTATCTTGCTCTGAACCCCAACGTACCTTATTTCTGCAAGTGTCTTGGGAGAGAACAAAG-ATCCGGCTTTGTTATTACACTTACTGACGGCCATTACAGCCTGG

**Xrcc4 #2 (999/31)**

1  
WT M E R K V S R I Y L A S E P N V P Y F L Q V S W E R T I G S G F V I T L T D G H S A W  
ATGGAAGGAAAGTAAGCAGAAATCTATCTTGCTCTGAACCCCAACGTACCTTATTTCTGCAAGTGTCTTGGGAGAGAACAAATAGGATCCGGCTTTGTTATTACACTTACTGACGGCCATTACAGCCTGG  
Allele 1 ATGGAAGGAAAGTAAGCAGAAATCTATCTTGCTCTGAACCCCAACGTACCTTATTTCTGCAAGTGTCTAG-ATCCGGCTTTGTTATTACACTTACTGACGGCCATTACAGCCTGG

M E R K V S R I Y L A S E P N V P Y F L Q V S W E R T I G S G F V I T L T D G H S A W  
WT ATGGAAGGAAAGTAAGCAGAAATCTATCTTGCTCTGAACCCCAACGTACCTTATTTCTGCAAGTGTCTTGGGAGAGAACAAATAGGATCCGGCTTTGTTATTACACTTACTGACGGCCATTACAGCCTGG  
Allele 2 ATGGAAGGAAAGTAAGCAGAAATCTATCTTGCTCTGAACCCCAACGTACCTTGAATTTCTTAGTGTATTA-----TTATTACACTTACTGACGGCCATTACAGCCTGG

**Paxx #1 (275/8)**

1  
WT M A P P L L S L P L C I L P P G S G S P R L V C Y C E R D S G G D G D R D D F N L  
ATGGCTCCTCCGTTGTTGCTGCTCCGCTTTGTTATTCTGCCCGGGTTTCGGGCTCCCCCGCCTGGTGTGC TACTGCGAGCGGGATAGTGGTGGAGACGGGGACCGGACGACTTCAACCTC  
Allele 1 ATGGCTCCTCCGTTGTTGCTGCTCCGCTTTGTTATTCTGCCCGGGTTTCGGGCTCCCCCGCCTGGTGTGC TACTGCGAGCGGGATAGTGGTGGAGACGGGGACCGGACGACTTCAACCTC

M A P P L L S L P L C I L P P G S G S P R L V C Y C E R D S G G D G D R D D F N L  
WT ATGGCTCCTCCGTTGTTGCTGCTCCGCTTTGTTATTCTGCCCGGGTTTCGGGCTCCCCCGCCTGGTGTGC TACTGCGAGCGGGATAGTGGTGGAGACGGGGACCGGACGACTTCAACCTC  
Allele 2 ATGGCTCCTCCGTTGTTGCTGCTCCGCTTTGTTATTCTGCCCGGGTTTCGGGCTCCCCCGCCTGGTGTGC AACAGGGGACGGCA-ACTGGTGGAGACGGGGACCGGACGACTTCAACCTC

**Paxx #2 (275/14)**

1  
WT M A P P L L S L P L C I L P P G S G S P R L V C Y C E R D S G G D G D R D D F N L  
ATGGCTCCTCCGTTGTTGCTGCTCCGCTTTGTTATTCTGCCCGGGTTTCGGGCTCCCCCGCCTGGTGTGC TACTGCGAGCGGGATAGTGGTGGAGACGGGGACCGGACGACTTCAACCTC  
Allele 1 ATGGCTCCTCCGTTGTTGCTGCTCCGCTTTGTTATTCTGCCCGGGTTTCGGGCTCCCCCGCCTGGTGTGC TACTGCGAGCGGGATAGTGGTGGAGACGGGGACCGGACGACTTCAACCTC

M A P P L L S L P L C I L P P G S G S P R L V C Y C E R D S G G D G D R D D F N L  
WT ATGGCTCCTCCGTTGTTGCTGCTCCGCTTTGTTATTCTGCCCGGGTTTCGGGCTCCCCCGCCTGGTGTGC TACTGCGAGCGGGATAGTGGTGGAGACGGGGACCGGACGACTTCAACCTC  
Allele 2 ATGGCTCCTCCGTTGTTGCTGCTCCGCTTTGTTATTCTGCCCGGGTTTCGGGCTCCCCCGCCTGGTGTGC TACTGCGAGCGGGATAGTGGTGGAGACGGGGACCGGACGACTTCAACCTC

**Appendix Figure S1. Genotypes of novel mutant CH12 cells generated for this study.** WT CH12 cells were used to knockout the indicated genes through CRISPR/Cas9 using the sgRNAs listed in Table EV2. Sequencing results for each of these mutants are shown.

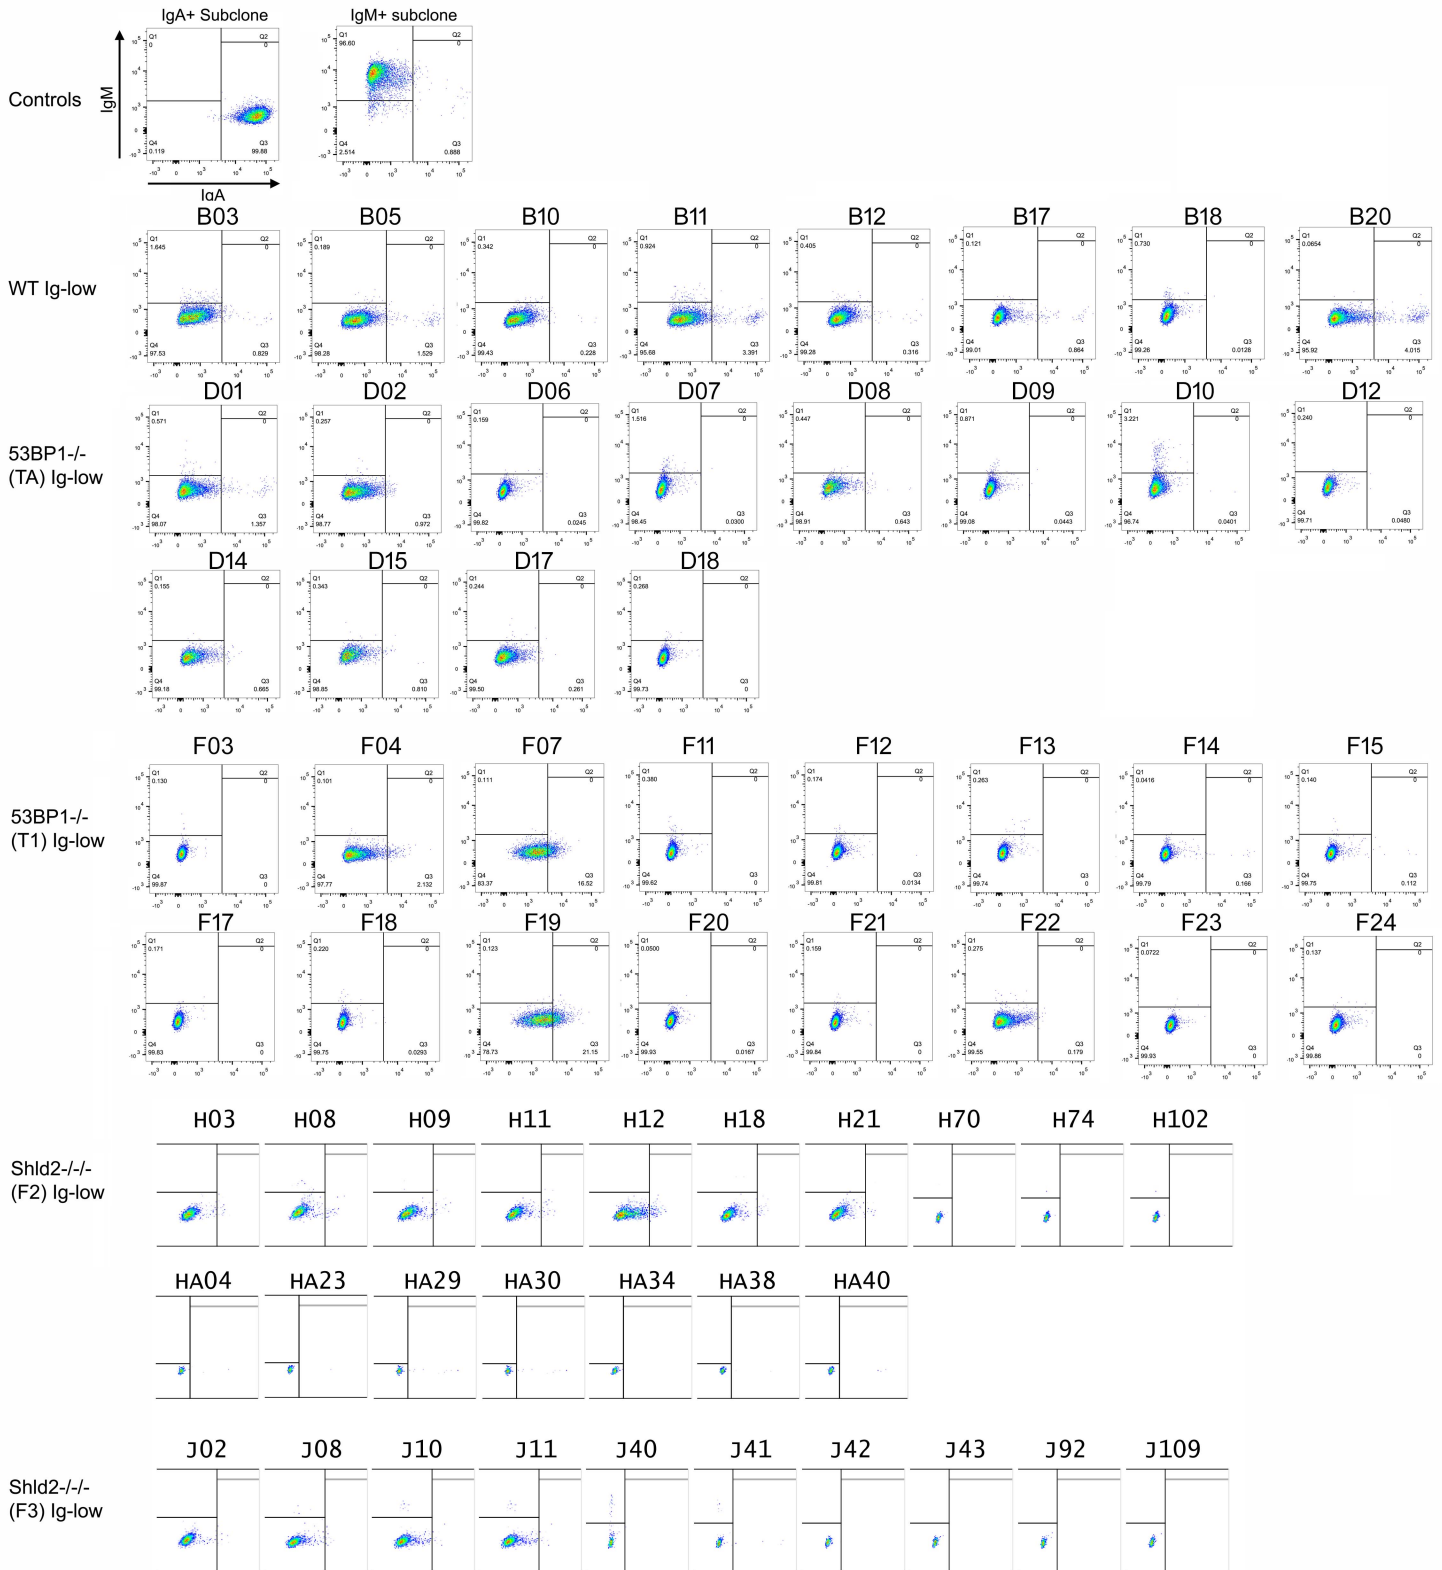

**Appendix Figure S2. Flow Cytometry analysis of IgM WT, 53bp1<sup>-/-</sup> and Shld2<sup>-/-</sup> CH12 subclones.** Ig-lo cells from WT, 53bp1<sup>-/-</sup> and Shld2<sup>-/-</sup> CH12 cells were sorted and subcloned and reanalyzed for expression of IgM and IgA by flow cytometry. As positive controls, expression of IgA and IgM are shown for two specific subclones that are IgA or IgM positive.
